# Supplementary material for: TGR5 reduces macrophage migration through mTOR-induced C/EBPβ differential translation
Source: JCI journal article supplement (doi:10.1172/jci76289), 2014-11-02
Supplement: sd1 [file 1]

## Supplemental Information

### SUPPLEMENTARY FIGURE LEGENDS

#### **Supplemental Figure 1. *Characterization of $Tgr5^{bm+/+}$ and $Tgr5^{bm-/-}$ mice.***

(A) Quantitative real time analysis of *Tgr5* on genomic DNA extracted from peripheral blood. (B) Daily food and (C) water intake measured in HFD-fed *Tgr5^{bm+/+}* (white bar) and *Tgr5^{bm-/-}* (black bar) mice. n=12/group. Results represent the mean±SEM. P values were calculated by using two tailed Student's t test and one-way ANOVA test followed by Bonferroni's post hoc analysis when appropriate.

#### **Supplemental Figure 2. *Comparable inflammation in gastrocnemius derived from $Tgr5^{bm-/-}$ and $Tgr5^{bm+/+}$ mice.***

(A) mRNA levels of macrophage markers in gastrocnemius of HFD-fed *Tgr5^{bm+/+}* (white bar) and *Tgr5^{bm-/-}* (black bar) mice. n=12/group. (B-C) mRNA levels of (B) pro-inflammatory M1 and (C) anti-inflammatory M2 markers in gastrocnemius of HFD-fed *Tgr5^{bm+/+}* and *Tgr5^{bm-/-}* mice. n=12/group. Results represent the mean±SEM. P values were calculated by using two tailed Student's t test. \*statistically significant, p<0.05.

#### **Supplemental Figure 3. *Glucose homeostasis and macrophage infiltration in eWAT of $LysM-Cre Tgr5^{fl/fl}$ mice.***

(A) mRNA levels of Tgr5 in primary bone marrow-derived macrophages (BMDMs) isolated from *Tgr5<sup>fl/fl</sup>* or LysM-Cre *Tgr5<sup>fl/fl</sup>* mice. n=4/group. (B) Blood glucose levels during insulin tolerance test (ITT) (insulin; 0.50 U/kg) in chow diet-fed *Tgr5<sup>fl/fl</sup>* and LysM-Cre *Tgr5<sup>fl/fl</sup>* mice. n=12/group. (C) Plasma levels of insulin during an oral glucose tolerance test (OGTT) in chow diet-fed *Tgr5<sup>fl/fl</sup>* and LysM-Cre *Tgr5<sup>fl/fl</sup>* mice. n=12/group. (D) Blood glucose levels during OGTT in chow diet-fed *Tgr5<sup>fl/fl</sup>* and LysM-Cre *Tgr5<sup>fl/fl</sup>* mice. n=12/group. (E) mRNA levels of macrophage markers in eWAT of chow diet-fed *Tgr5<sup>fl/fl</sup>* and LysM-Cre *Tgr5<sup>fl/fl</sup>* mice. n=12/group. Results represent the mean±SEM. P values were calculated by using two tailed Student's t test and two-way ANOVA test followed by Bonferroni's post hoc analysis when appropriate. \*\*\*p<0.001.

**Supplemental Figure 4. Chemokine and chemokine receptor expression in *Tgr5<sup>+/+</sup>* and *Tgr5<sup>-/-</sup>* BMDMs.**

(A-E) mRNA levels of chemokines and their cognate receptors in primary bone marrow-derived macrophages (BMDMs) isolated from *Tgr5<sup>+/+</sup>* or *Tgr5<sup>-/-</sup>* mice and stimulated with LPS (10 ng/mL) for 24 hr, in presence or absence of the TGR5 agonist INT-777 (30µM). n=6/group. Results represent the mean±SEM. P values were calculated by using one-way ANOVA test followed by Bonferroni's post hoc analysis. \*p<0.05 \*\*p<0.01, \*\*\*p<0.001 versus genotype and #p<0.001 versus control.

**Supplemental Figure 5. Expression of nuclear receptors and their target genes in *Tgr5<sup>+/+</sup>* and *Tgr5<sup>-/-</sup>* BMDMs.**

**(A-C)** mRNA levels of **(A)** PPAR $\gamma$ 1 and its target genes **(B)** CD36 and **(C)** Lpl in primary bone marrow-derived macrophages (BMDMs) isolated from *Tgr5*<sup>+/+</sup> or *Tgr5*<sup>-/-</sup> mice and stimulated with LPS (10 ng/mL) for 24 hr, in presence or absence of the TGR5 agonist INT-777 (30 $\mu$ M). n=6/group. **(D-I)** mRNA levels of **(D)** LXR $\alpha$ , **(E)** LXR $\beta$  and their target genes **(F)** ApoE, **(G)** Abca1, **(H)** Abcg1 and **(I)** Srebp1c in primary bone marrow-derived macrophages (BMDMs) isolated from *Tgr5*<sup>+/+</sup> or *Tgr5*<sup>-/-</sup> mice and stimulated with LPS (10 ng/mL) for 24 hr, in presence or absence of the TGR5 agonist INT-777 (30 $\mu$ M). n=6/group. Results represent the mean $\pm$ SEM. P values were calculated by using one-way ANOVA test followed by Bonferroni's post hoc analysis. \*p<0.05 \*\*p<0.01, \*\*\*p<0.001 versus genotype and #p<0.001 versus control.

**Supplemental Table 1. Haematological parameters measured in *Tgr5*<sup>bm+/+</sup> and *Tgr5*<sup>bm-/-</sup> mice after 18 week of HFD (n=6/group).**

Supplemental Figure 1

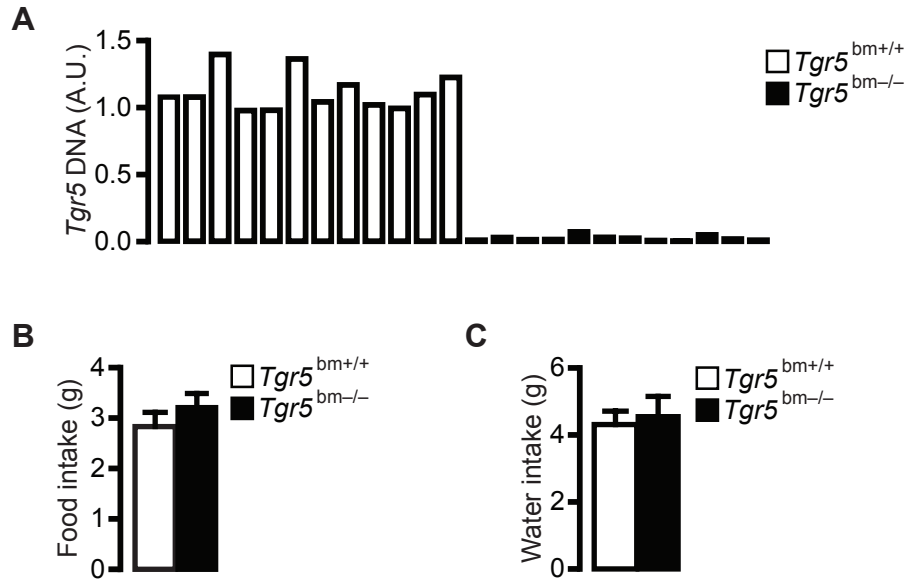

**Supplemental Figure 1.**

Characterization of *Tgr5*<sup>bm+/+</sup> and *Tgr5*<sup>bm-/-</sup> mice. **(A)** Quantitative real time analysis of *Tgr5* on genomic DNA extracted from peripheral blood of *Tgr5*<sup>bm+/+</sup> and *Tgr5*<sup>bm-/-</sup> mice. n=12/group. **(B)** Daily food and **(C)** water intake measured in HFD-fed *Tgr5*<sup>bm+/+</sup> (white bar) and *Tgr5*<sup>bm-/-</sup> (black bar) mice. n=12/group. Results represent the mean±SEM. P values were calculated by using two tailed Student's t test and one-way ANOVA test followed by Bonferroni's post hoc analysis when appropriate.

## Supplemental Figure 2

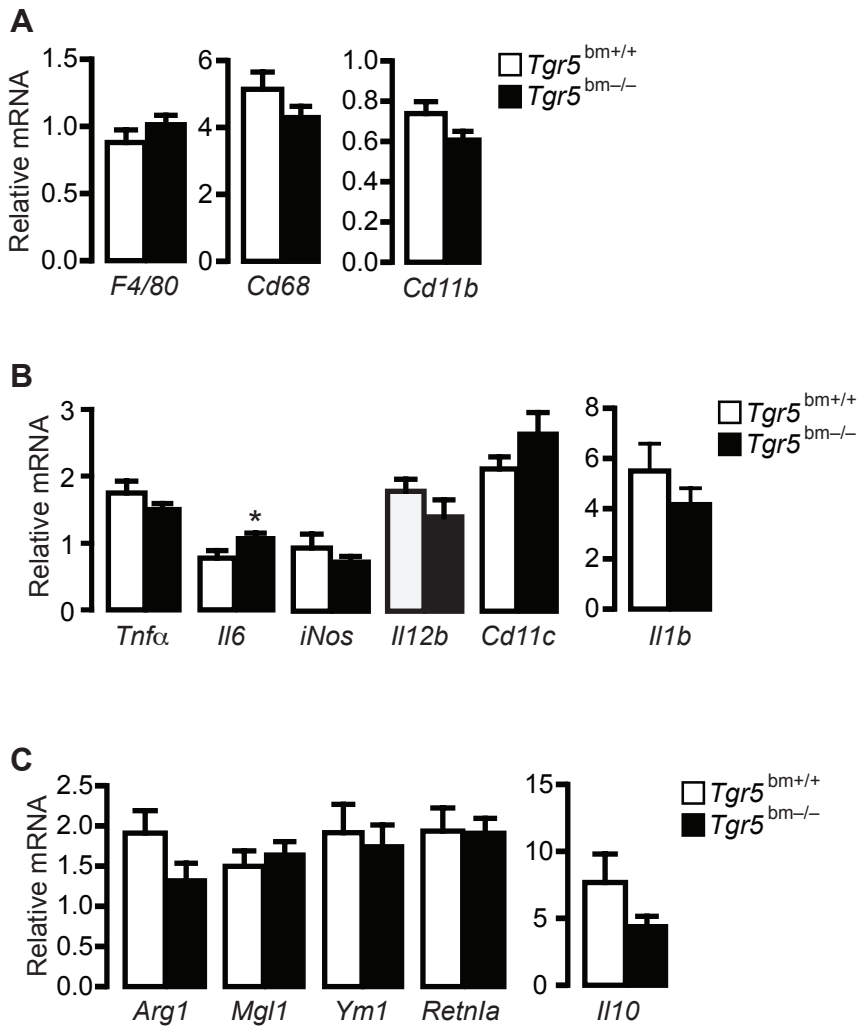

### Supplemental Figure 2.

Comparable inflammation in gastrocnemius derived from  $Tgr5^{bm-/-}$  and  $Tgr5^{bm+/+}$  mice. **(A)** mRNA levels of macrophage markers in gastrocnemius of HFD-fed  $Tgr5^{bm+/+}$  (white bar) and  $Tgr5^{bm-/-}$  (black bar) mice.  $n=12$ /group. **(B-C)** mRNA levels of **(B)** pro-inflammatory M1 and **(C)** anti-inflammatory M2 markers in gastrocnemius of HFD-fed  $Tgr5^{bm+/+}$  and  $Tgr5^{bm-/-}$  mice.  $n=12$ /group. Results represent the mean $\pm$ SEM. P values were calculated by using two tailed Student's t test. \*statistically significant,  $p<0.05$ .

Supplemental Figure 3

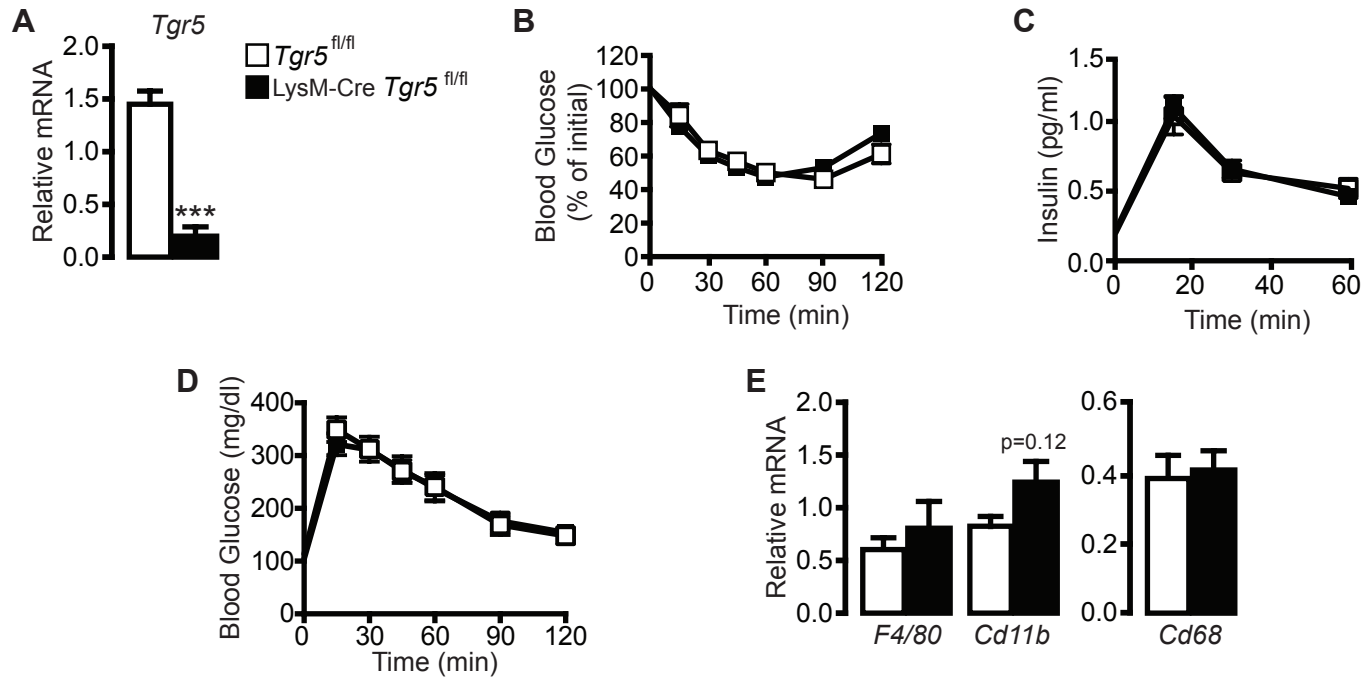

**Supplemental Figure 3.**

Glucose homeostasis and macrophage infiltration in eWAT of LysM-Cre *Tgr5*<sup>fl/fl</sup> mice. **(A)** mRNA levels of *Tgr5* in primary bone marrow-derived macrophages (BMDMs) isolated from *Tgr5*<sup>fl/fl</sup> or LysM-Cre *Tgr5*<sup>fl/fl</sup> mice. n=4/group. **(B)** Blood glucose levels during insulin tolerance test (ITT) (insulin; 0.50 U/kg) in chow diet-fed *Tgr5*<sup>fl/fl</sup> and LysM-Cre *Tgr5*<sup>fl/fl</sup> mice. n=12/group. **(C)** Plasma levels of insulin during an oral glucose tolerance test (OGTT) in chow diet-fed *Tgr5*<sup>fl/fl</sup> and LysM-Cre *Tgr5*<sup>fl/fl</sup> mice. n=12/group. **(D)** Blood glucose levels during OGTT in chow diet-fed *Tgr5*<sup>fl/fl</sup> and LysM-Cre *Tgr5*<sup>fl/fl</sup> mice. n=12/group. **(E)** mRNA levels of macrophage markers in eWAT of chow diet-fed *Tgr5*<sup>fl/fl</sup> and LysM-Cre *Tgr5*<sup>fl/fl</sup> mice. n=12/group. Results represent the mean±SEM. P values were calculated by using two tailed Student's t test and two-way ANOVA test followed by Bonferroni's post hoc analysis when appropriate. \*\*\* p<0.001.

Supplemental Figure 4

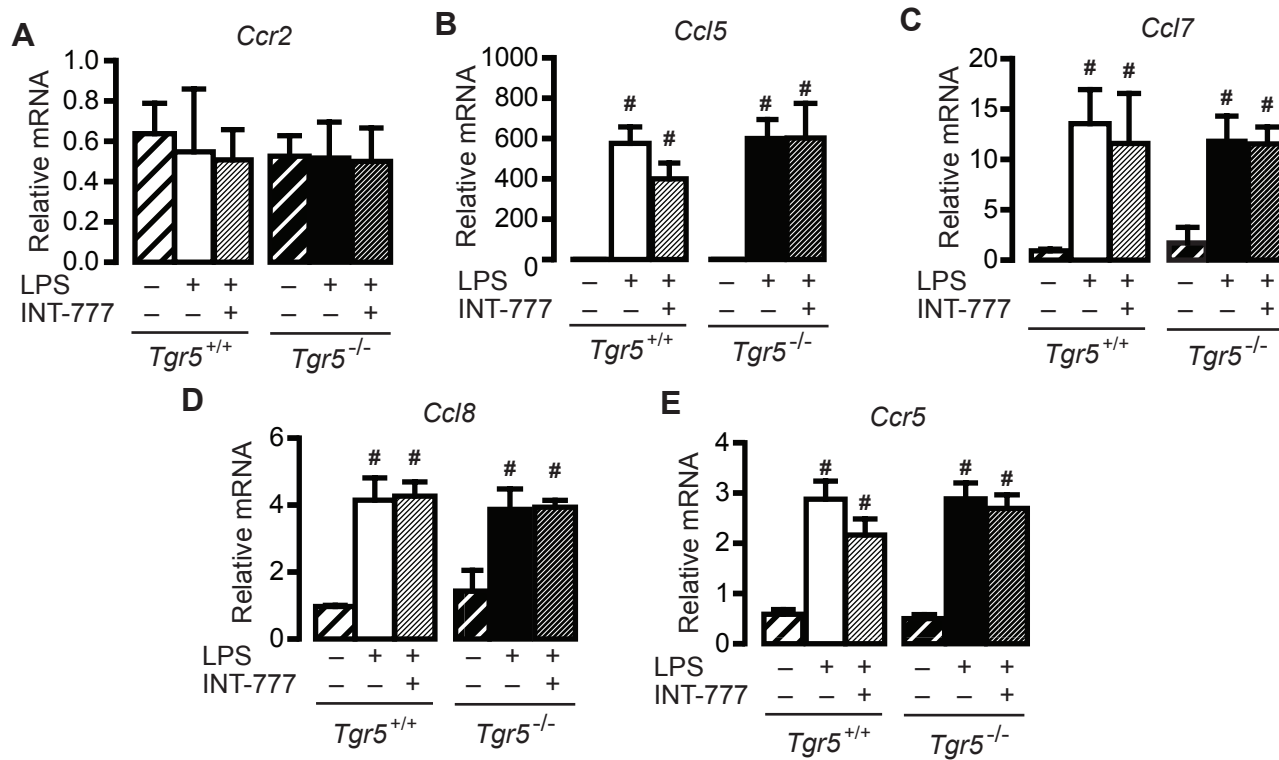

**Supplemental Figure 4.**

Chemokine and chemokine receptor expression in *Tgr5*<sup>+/+</sup> and *Tgr5*<sup>-/-</sup> BMDMs. **(A-E)** mRNA levels of chemokines and their cognate receptors in primary bone marrow-derived macrophages (BMDMs) isolated from *Tgr5*<sup>+/+</sup> or *Tgr5*<sup>-/-</sup> mice and stimulated with LPS (10 ng/mL) for 24 hr, in presence or absence of the TGR5 agonist INT-777 (30 μM). n=6/group. Results represent the mean±SEM. P values were calculated by using one-way ANOVA test followed by Bonferroni's post hoc analysis. \*p<0.05, \*\*p<0.01, \*\*\*p<0.001 versus genotype and #p<0.001 versus control.

Supplemental Figure 5

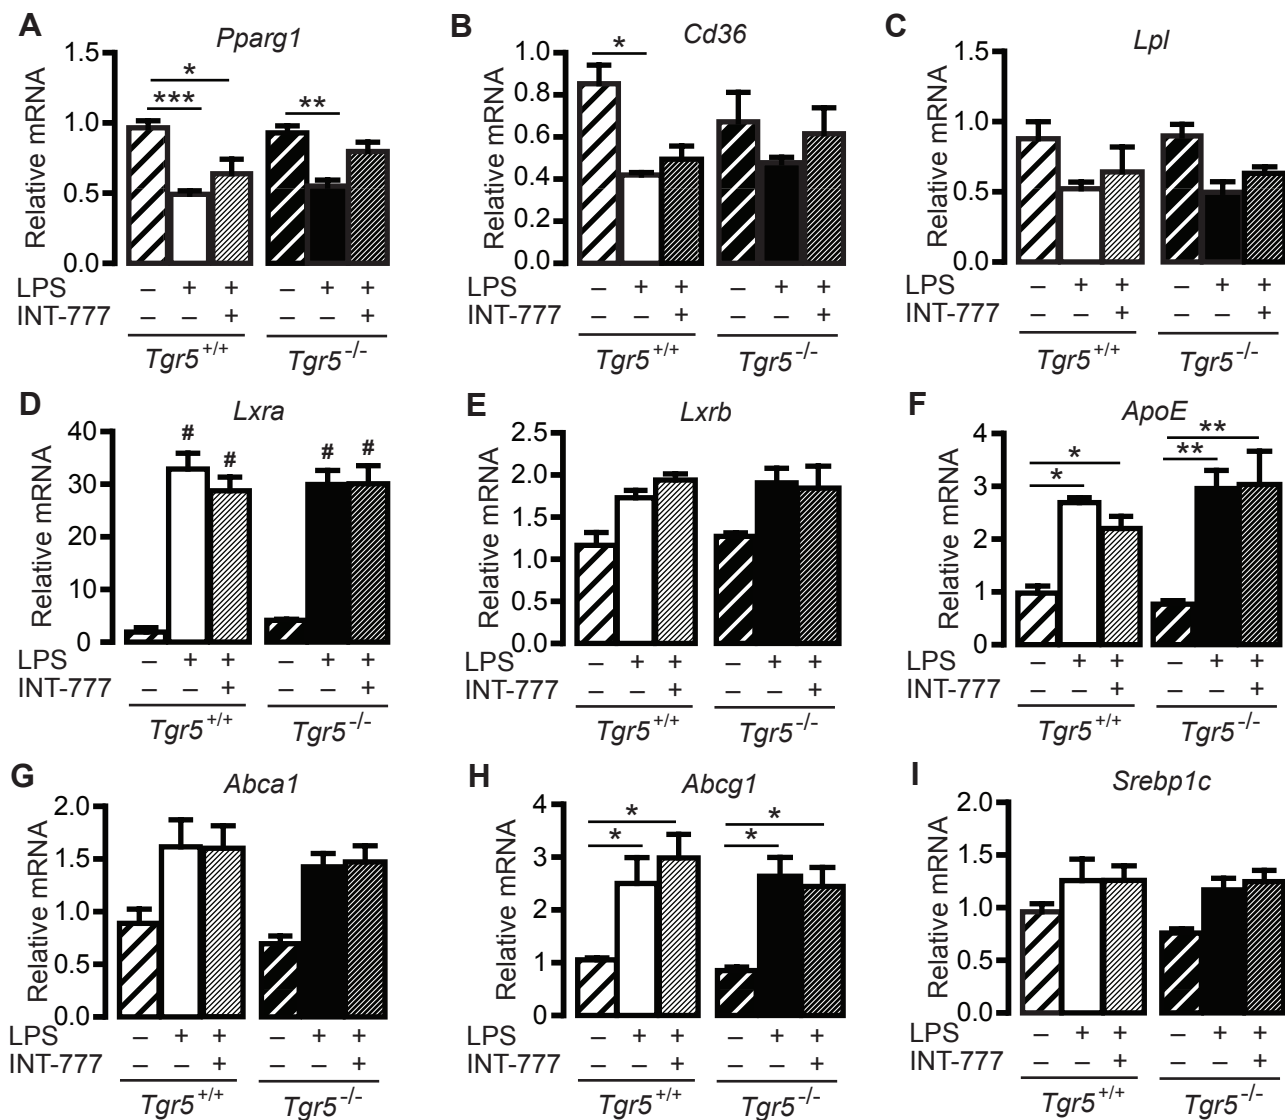

**Supplemental Figure 5.**

Expression of nuclear receptors and their target genes in *Tgr5*<sup>+/+</sup> and *Tgr5*<sup>-/-</sup> BMDMs. **(A-C)** mRNA levels of **(A)** PPAR $\gamma$ 1 and its target genes **(B)** CD36 and **(C)** Lpl in primary bone marrow-derived macrophages (BMDMs) isolated from *Tgr5*<sup>+/+</sup> or *Tgr5*<sup>-/-</sup> mice and stimulated with LPS (10 ng/mL) for 24 hr, in presence or absence of the TGR5 agonist INT-777 (30 $\mu$ M). n=6/group. **(D-I)** mRNA levels of **(D)** LXR $\alpha$ , **(E)** LXR $\beta$  and their target genes **(F)** ApoE, **(G)** Abca1, **(H)** Abcg1 and **(I)** Srebp1c in primary bone marrow-derived macrophages (BMDMs) isolated from *Tgr5*<sup>+/+</sup> or *Tgr5*<sup>-/-</sup> mice and stimulated with LPS (10 ng/mL) for 24 hr, in presence or absence of the TGR5 agonist INT-777 (30  $\mu$ M). n=6/group. Results represent the mean $\pm$ SEM. P values were calculated by using one-way ANOVA test followed by Bonferroni's post hoc analysis. \*p<0.05, \*\*p<0.01, \*\*\*p<0.001 versus genotype and #p<0.001 versus control.
